# Supplementary material
Source: PubMed Central journal article supplement (PMC2374372)
Supplement: 97320630002284S1.pdf [file 97320630002284S1.pdf]

### Supplementary material

#### Tables:

| sRNA   | Start   | End     | orientation | length nt | Genome from which STS are extracted | flanking genes id |
|--------|---------|---------|-------------|-----------|-------------------------------------|-------------------|
| csrB   | 3377288 | 3377636 | -           | 349       | eco                                 | sma3187/sma3190   |
| csrC   | 4371671 | 4371785 | -           | 115       | eco                                 | sma4096/sma4098   |
| ffs    | 388557  | 388672  | .           | 116       | eco                                 | sma0360/sma0362   |
| gcvB   | 3384355 | 3384555 | .           | 201       | eco                                 | sma3196/sma3197   |
| micF   | 2809693 | 2809725 | .           | 33        | eco                                 | sma2659/sma2652   |
| oxyS   | 4269827 | 4269867 | +           | 41        | eco                                 | sma3997/sma4002   |
| mpB    | 3795714 | 3796080 | -           | 367       | eco                                 | sma3569/sma3570   |
| rprA   | 1515148 | 1515194 | -           | 47        | eco                                 | sma1448/sma1449   |
| rtt    | 2101702 | 2101831 | .           | 130       | eco                                 | */sma1982         |
| rtt    | 2101527 | 2101656 | .           | 130       | eco                                 | */sma1982         |
| rybB   | 974791  | 974868  | .           | 77        | eco                                 | sma0925/sma0930   |
| ryeA   | 1278736 | 1278883 | -           | 147       | eco                                 | sma1216/sma1217   |
| rye    | 3121483 | 3121568 | .           | 86        | eco                                 | sma2954/sma2955   |
| sraE   | 3418083 | 3418175 | +           | 93        | eca                                 | sma3223/sma3228   |
| spf    | 4373220 | 4373328 | -           | 109       | eco                                 | sma4098/sma4099   |
| sraA   | 419341  | 419369  | .           | 29        | eco                                 | sma0343/sma0344   |
| sraB   | 1226373 | 1226453 | +           | 81        | eco                                 | sma1158/sma1159   |
| sraD   | 188225  | 188299  | .           | 75        | eco                                 | sma0166/sma0167   |
| sraF   | 3780424 | 3780611 | .           | 188       | eco                                 | sma3551/sma3553   |
| sraH   | 3802264 | 3802317 | +           | 54        | eco                                 | sma3576/sma3577   |
| sraI   | 4147535 | 4147593 | .           | 59        | eco                                 | */sma3898         |
| ssrA   | 3251988 | 3252351 | .           | 364       | eco                                 | sma3078/ *        |
| ssrS   | 3518913 | 3519095 | .           | 183       | eco                                 | sma3318/sma3319   |
| tke1   | 3214595 | 3214762 | .           | 168       | yps                                 | sma3041/sma3042   |
| tp2    | 3636376 | 3636534 | .           | 159       | eco                                 | sma3419/sma3420   |
| tpke70 | 1209585 | 1209953 | .           | 368       | eco                                 | */sma1142         |
| t44    | 3360413 | 3360472 | +           | 60        | eco                                 | sma3178/sma3179   |

**Table 1a:** List of additional sRNA locations identified in *S.marcescens* Db1 genome (\* - indicates the ASL identified containing single conserved flanking gene).
